# Supplementary material
Source: PubMed Central journal article supplement (PMC5498101)
Supplement: NIHMS869630-supplement-ESI.pdf [file NIHMS869630-supplement-ESI.pdf]

**Supplementary Table S1.** List of primers, and forward and reverse sequence and length of the 26 primers used for qPCR.

| Primer           | Sequence                        | Length |
|------------------|---------------------------------|--------|
| GAPDH F          | AAT GGT GAA GGT CGG TGT G       | 19     |
| GAPDH R          | GTG GAG TCA TAC TGG AAC ATG TAG | 24     |
| $\beta$ -ACTIN F | CTG AAC CCT AAG GCC AAC C       | 19     |
| $\beta$ -ACTIN R | GTA CGA CCA GAG GCA TAC AG      | 20     |
| IGF1 F           | AGT ACA TCT CCA GTC TCC TCA G   | 22     |
| IGF1 R           | ATG CTC TTC AGT TCG TGT GT      | 20     |
| IGF2 F           | CAC TCT TCC ACG ATG CCA         | 18     |
| IGF2 R           | CAC GCT TCA GTT TGT CTG TTC     | 21     |
| FGF2 F           | GAA ACA CTC TTC TGT AAC ACA CTT | 24     |
| FGF2 R           | GTC AAA CTA CAA CTC CAA GCA G   | 22     |
| FGF8 F           | GTA GTT GTT CTC CAG CAC GAT     | 21     |
| FGF8 R           | GAC AGG TCT CTA CAT CTG CAT     | 21     |
| NGF F            | TTG CTA TCT GTG TAC GGT TCT G   | 22     |
| NGF R            | GGA CGC AGC TTT CTA TAC TGG     | 21     |
| SHH F            | CGT AAG TCC TTC ACC AGC TTG     | 21     |
| SHH R            | GAA TCC AAA GCT CAC ATC CAC     | 21     |
| SFRP F           | CTT CTT GTC ACC GTT TTC CTT C   | 22     |
| SFRP R           | GAG TTG AAG TCA GAG GCC ATC     | 21     |
| VEGFA F          | TGG TGA CAT GGT TAA TCG GT      | 20     |
| VEGFA R          | AGA AAG ACA GAA CAA AGC CAG A   | 22     |
| VEGFB F          | GCT TCA CAG CAC TCT CCT T       | 19     |
| VEGFB R          | CAA GTC CGA ATG CAG ATC CTC     | 21     |
| VEGFC F          | CAG CGG CAT ACT TCT TCA CTA     | 21     |
| VEGFC R          | GAA GTT CCA CCA TCA AAC ATG C   | 22     |
| NTF3 F           | ACA TCA CCT TGT TCA CCT GTA     | 21     |
| NTF3 R           | AGT CCA CCT TTC TCT TCA TGT C   | 22     |
| NTF5 F           | GAA GAG GAA AAG GAG GAG AGA AC  | 23     |
| NTF5 R           | GAG ACT ACC TGT ATC CTA CAA AGG | 24     |
| PAX1 F           | GCC CAG TCT TCC ATC TTG G       | 19     |
| PAX1 R           | GCA CAT TCA GTC AGC AAC ATC     | 21     |
| ALDH1A1 F        | ACC CAG TTC TCT TCC ATT TCC     | 21     |
| ALDH1A1 R        | CAT CAC TGT GTC ATC TGC TCT     | 21     |
| WNT5a F          | CCA GAC ACT CCA TGA CAC TTA C   | 22     |
| WNT5a R          | ACG CAT CCT CAT GAA CTT ACA C   | 22     |
| WNT9a F          | TTC CAC TCC AGC CTT TAT CAC     | 21     |
| WNT9a R          | GTA CAG CAG CAA GTT TGT CAA G   | 22     |
| CXCL12 F         | ACA GTT TGG AGT GTT GAG GAT     | 21     |
| CXCL12 R         | GCG CTC TGC ATC AGT GA          | 17     |
| GDNF F           | CGT CAT CAA ACT GGT CAG GAT     | 21     |
| GDNF R           | CCG CTG AAG ACC ACT CC          | 17     |
| TGF $\beta$ 1 F  | CCG AAT GTC TGA CGT ATT GAA GA  | 23     |
| TGF $\beta$ 1 R  | GCG GAC TAC TAT GCT AAA GAG G   | 22     |
| TGF $\beta$ 2 F  | CTG ATC ACC ACT GGC ATA TGT AG  | 23     |
| TGF $\beta$ 2 R  | TGT ACC TTC GTG CCG TCT A       | 19     |
| TGF $\beta$ 3 F  | ACT GAG GAC ACA TTG AAA CGA     | 21     |
| TGF $\beta$ 3 R  | GCC AAA GAG ATC CAT AAA TTC GAC | 24     |
| BDNF F           | GCA ACC GAA GTA TGA AAT AAC CA  | 23     |
| BDNF R           | GTT TAT CAC CAG GAT CTA GCC A   | 22     |
| CNTF F           | AGA TAG AGC GGC TAC AGA GG      | 20     |
| CNTF R           | GTG AAG ACA GAA GCA AAC CAG     | 21     |

**Supplementary Table S2.** List of the reagents used, with their vendors and catalog numbers.

| <b>Reagents</b>                                          | <b>Vendor</b>          | <b>Catalog #</b> |
|----------------------------------------------------------|------------------------|------------------|
| Gelatin                                                  | Sigma                  | G1393            |
| Glasgow minimum essential medium (GMEM)                  | Life Technologies      | 11710-035-6      |
| Knockout serum replacement (KSR)                         | Life Technologies      | 10828028         |
| Glutamax                                                 | Life Technologies      | 35050-061        |
| Fetal bovine serum (FBS)                                 | Sigma                  | 12306C           |
| Non-essential amino acids (NEAA)                         | Life Technologies      | 11140-050        |
| Sodium pyruvate                                          | Life Technologies      | 11360-050        |
| 2-mercaptoethanol                                        | Life Technologies      | 21985023         |
| Leukemia inhibitory factor (LIF)                         | Millipore              | ESG1107          |
| Alpha MEM                                                | Life Technologies      | 12571-048        |
| Antibiotic-antimycotic                                   | Life Technologies      | 15240-062        |
| Mitomycin-c                                              | Sigma                  | M4287            |
| Polyethylene glycol (PEG)                                | Sigma                  | 94646            |
| Dextran (DEX)                                            | Pharmacosmos           | 551005009007     |
| Formaldehyde                                             | Fisher Scientific      | BP531-500        |
| Donkey serum                                             | Sigma                  | D9663            |
| PBS                                                      | Sigma                  | D8537            |
| B-tubulin antibody                                       | Biologend              | MRB 435P         |
| Nestin antibody                                          | Neuromics              | CH23001-100      |
| Glial fibrillary acidic protein (GFAP) antibody          | Neuromics              | CH22102          |
| Aminomethylcoumarin (AMCA) conjugated secondary antibody | Jackson ImmunoResearch | 703-155- 155     |
| Rhodamine red conjugated secondary antibody              | Jackson ImmunoResearch | 711-295- 152     |
| Alexa fluor-488 conjugated secondary antibody            | Jackson ImmunoResearch | 703-545-155      |
| Mercaptoethanol ultra                                    | Sigma                  | 63689            |
| RNA isolation kit                                        | Omega Biotek           | R6834-02         |
| RNase-free DNase kit                                     | Omega Biotek           | E1091-02         |
| Homogenizer mini columns                                 | Omega Biotek           | HCR003           |
| Transcriptor reverse transcriptase cDNA synthesis kit    | Roche                  | 04 897 030 001   |

Sybr green master mix

Roche

04 707 516 001

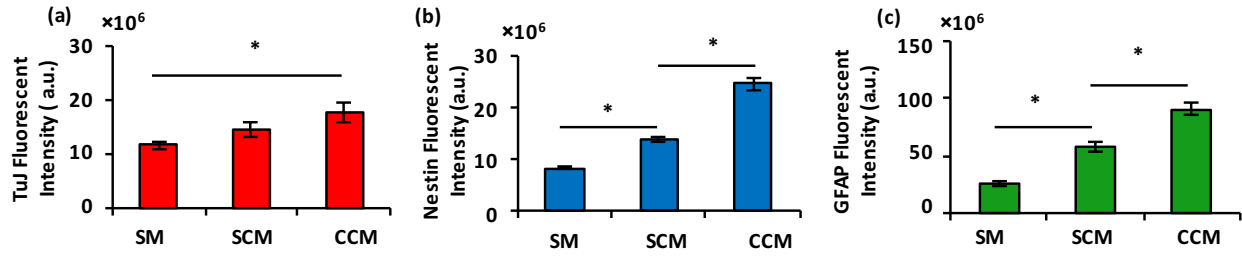

**Supplementary Figure S1.** Immunofluorescence quantification of neural cell differentiation of mESCs for (a) TuJ, (b) Nestin, and (c) GFAP. Data represent differentiation of a single mESC colony in co-culture with PA6 cells in a microwell under treatment with SM, SCM, and CCM. The number of replicates was N=20.

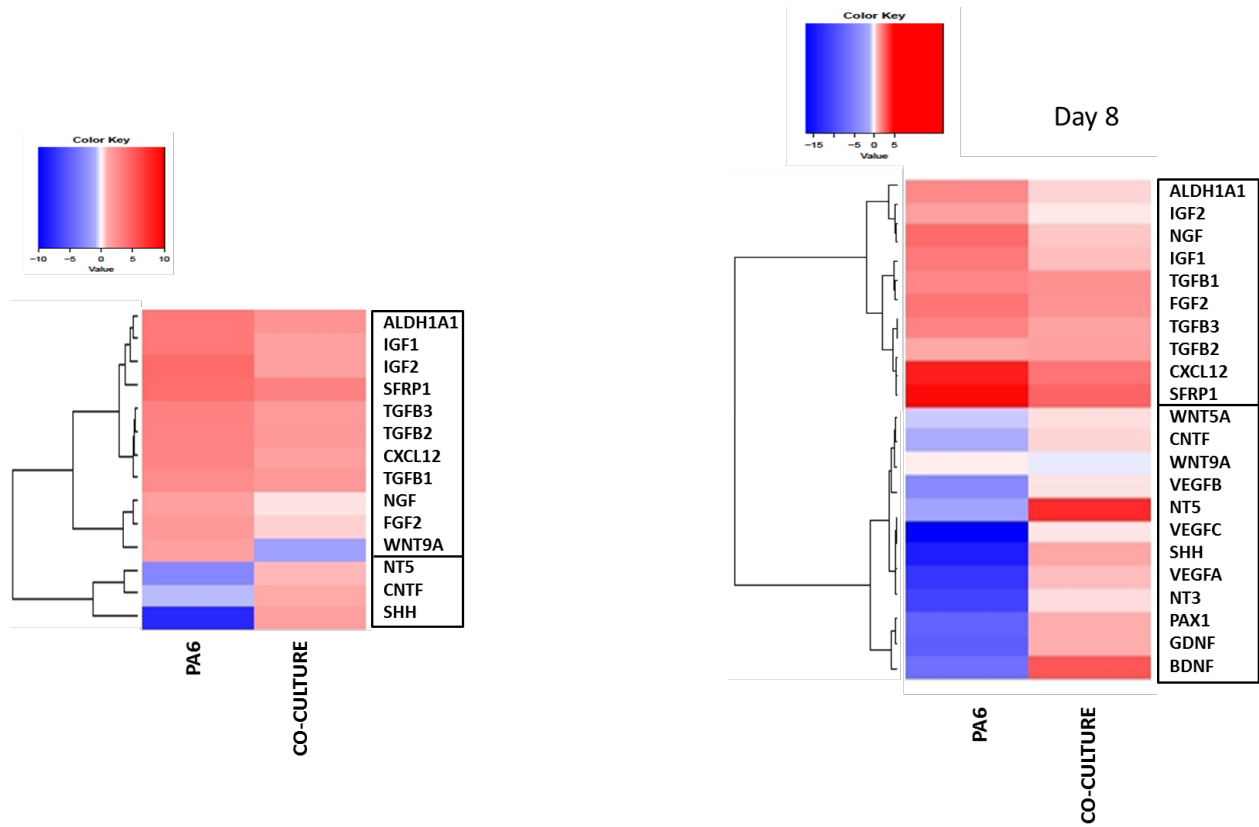

**Supplementary Figure S2.** Heatmap and hierarchical clustering of genes of representing specific soluble factors on (a) day 4 and (b) day 6 of cultures. Factors with fold change less than 2 are not included in the analysis.

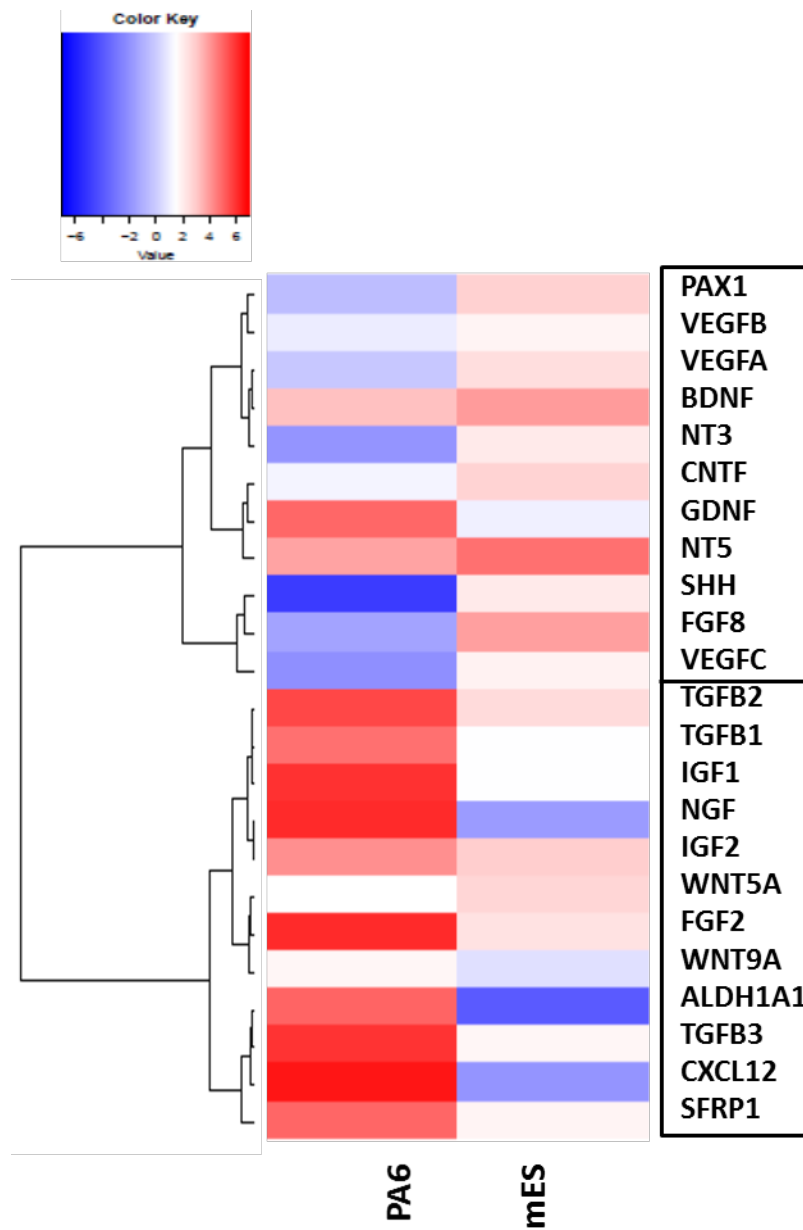

**Supplementary Figure S3.** Heatmap and hierarchical clustering of genes representing specific soluble factors. Data are from qPCR experiments with mESCs performed on day 8 after manually separating the differentiated mES colonies from PA6 feeder layer.
